# Supplementary material for: Yeast Particles Hyper-Loaded with Terpenes for Biocide Applications
Source: MDPI journal article supplement (doi:10.3390/molecules27113580), 2022-06-02
Supplement: s1 [file s1]

# Yeast Particles Hyper-loaded with Terpenes for Biocide Applications

Ernesto R. Soto, Florentina Rus, Gary R. Ostroff

## Supplementary Materials

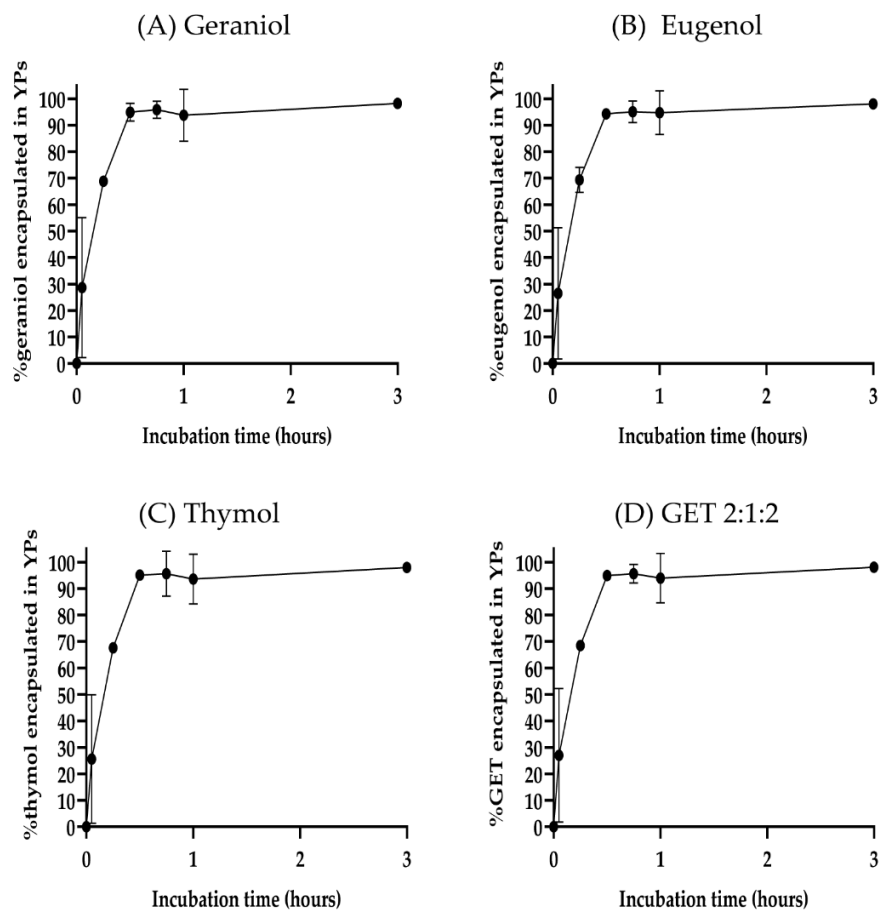

**Figure S1.** Kinetics of 2:1:2 GET loading in YPs showing similar rate of absorption for each terpene of the 2:1:2 GET mixture: (A) geraniol, (B) eugenol, (C) thymol, and (D) combined data of GET 2:1:2

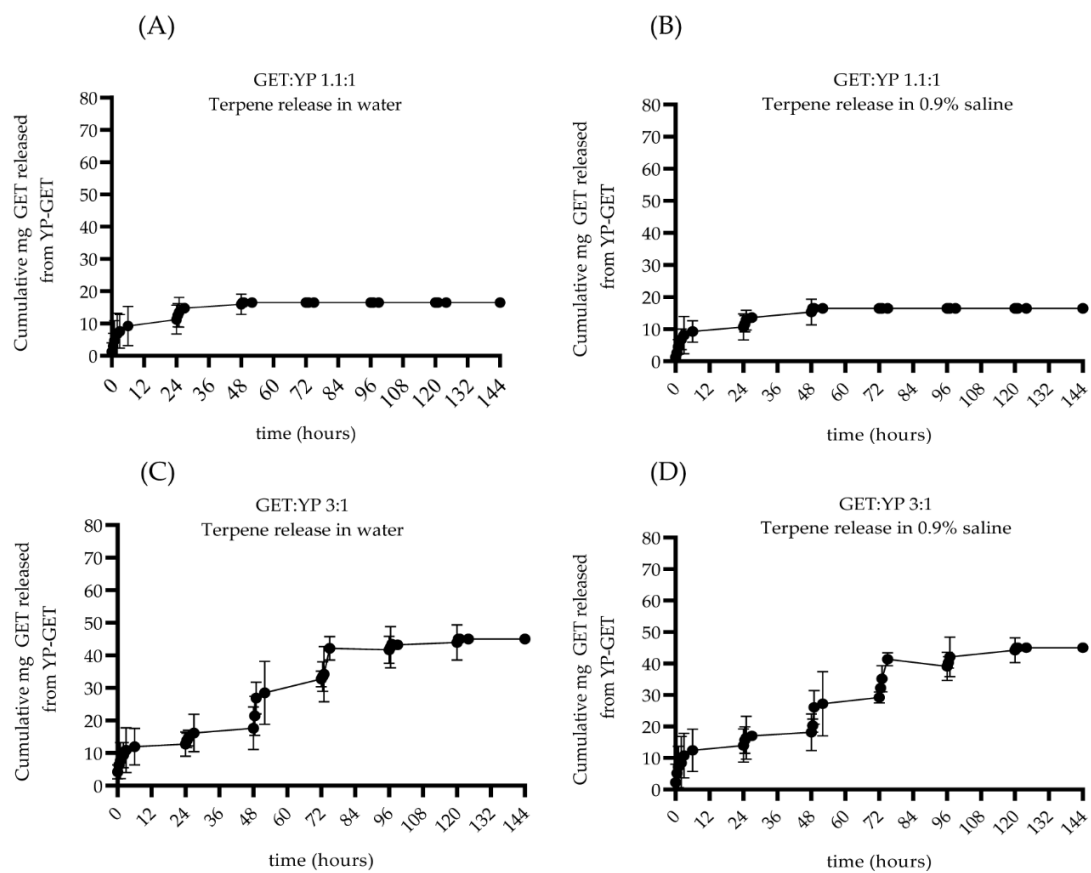

**Figure S2.** Cumulative GET release from YP GET 1.1:1 in (A) water, (B) 0.9% saline and YP GET 3:1 in (C) water and (D) 0.9% saline

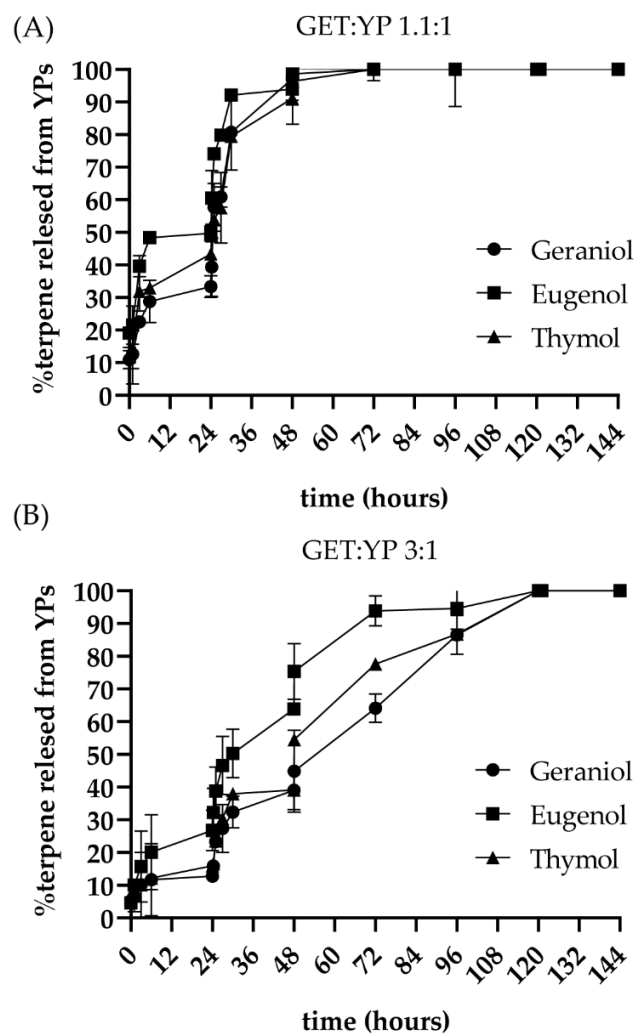

**Figure S3.** Kinetics of terpene release showing similar release pattern for geraniol, eugenol and thymol from YP GET formulations: (A) GET:YP 1.1:1, (B) GET:YP 3:1
